# Supplementary material
Source: publisher figshare collection journal article supplement (https://sage.figshare.com/ndownloader/files/11903741)
Supplement: Supplementary file 1 [file 11903741]

**Appendix F: Preregistration Study Information**

**Title**: Social Distance Increases Perceived Physical Distance

**Authorship**:

**Research Questions**: RQ1. Will manipulating social distance using a "warm" or "cold" script alter perceived social distance between participants? RQ2. Is there a correlation between the social distance between two participants in computer-mediated chat and the perceived physical distance from the conversational partner's purported location? RQ3. Will manipulating social distance using a "warm" or "cold" script thus alter perceived physical distance between participants?

**Hypotheses**: H1. Using a "warm" or "cold" script will manipulate social distance between participants in a computer-mediated chat, such that the "cold" script will result in greater social distance. H2. As social distance increases, perceived physical distance from the conversational partner's purported location will also increase. H3. Manipulating social distance by using a "warm" or "cold" script will manipulate perceived physical distance, such that greater social distance will result in greater perceived physical distance from the conversational partner's purported location.

**Sampling Plan**

**Existing Data**: Registration prior to creation of data

**Explanation of existing data**: We will not be using pre-existing data.

**Data collection procedures**:

We will be replicating a previous study using student participants drawn from the undergraduate population at X University using student participants from Y University. All students from the psychology pool will be eligible, and the study will be listed among the available studies to be completed for experimental credit. Students will receive one experimental credit for participating. We will run the study during the spring semester of 2016. The study will begin as soon as pre-registration is approved, and will close when the semester is over or when 88 participants in each of the two conditions have fulfilled the eligibility requirements, whichever comes first.

[Survey_Template.docx](https://osf.io/project/ye3wt/files/osfstorage/56b0f3846c613b0291afd7e6)

**Sample size**: We plan to analyze 88 participants per condition

**Sample size rationale**: Our original study used a power analysis based off of a correlative study. On journal submission, we were requested to rerun the study using the "typical published effect size in social/personality psychology (d = .43; Richard, Bond, &amp; Stokes-Zoota, 2003)"

**Stopping rule**: We will be replicating a previous study using student participants drawn from the undergraduate population at X University using student participants from Y University. All students from the psychology pool will be eligible. We will run the study during the spring semester of 2016. The study will begin as soon as pre-registration is approved, and will close when the semester is over; or when 88 participants in each of the two conditions have participated and passed the manipulation checks described in elimination criteria, whichever comes first.

**Variables**

**Manipulated variables**:

We will manipulate the script of the chat presented to the participant. Half of the participants will be randomly selected to interact with a "warm" conversational partner (which will be automated) and half will interact with a "cold" conversational partner (also automated).

no file selected

**Measured variables**:

The outcome variables will be two: Social presence will be the average of 20 questions on liking, affiliation and connectedness answered by each participant post-task. Perceived distance- Target City will be the distance estimated by each participant between their own location and the location of their "conversational partner" In order to compare to previous studies, this estimated distance, in miles, will be divided by the actual straight-line distance to the city in question (Lawrence, KS).

no file selected

**Indices**:

Social presence will be the average of 20 questions on liking, affiliation and connectedness answered by each participant post-task. Perceived distance- Target City will be the distance estimated by each participant between their own location and the location of their "conversational partner" In order to compare to previous studies, this estimated distance, in miles, will be divided by the actual straight-line distance to the city in question (Lawrence, KS).

no file selected

**Design Plan**

**Study type**: Experiment - A researcher randomly assigns treatments to study subjects, this includes field or lab experiments. This is also known as an intervention experiment and includes randomized controlled trials.

**Blinding**: For studies that involve human subjects, they will not know the treatment group to which they have been assigned. Research personnel who interact directly with the study subjects (either human or non-human subjects) will not be aware of the assigned treatments.

**Study design**:

We have a between subjects design with 1 factor (warm or cold conversation) with two levels. 1. The average of the 20 self-report questions on self presence will be the Social Distance variable. 2. The distance participants estimate between their own location and the location of their conversational partner will be divided by the actual straight-line distance to that city. This will create the Estimated Physical Distance Target City variable.

no file selected

**Randomization**: Participants will be randomly assigned to condition after they complete the consent form in the Qualtrics survey,

**Analysis Plan**

**Statistical models**:

We first will use a one-way between subjects ANOVA to analyze whether the manipulated, categorical independent variable of 'warm or cold conversation' affects the dependent variable of social presence. We next will find the correlation, using Pearson's R, between social presence and perceived physical distance-Target City. We will finally use a one-way between subjects ANOVA to analyze whether the manipulated, categorical independent variable of 'warm or cold conversation' affects the dependent variable of estimated physical distance-Target City.

no file selected

**Transformations**: NA

**Follow-up analyses**: NA

**Inference criteria**: We will be using a two-tailed test for our analysis.

**Data exclusion**: 1. Participants who do not complete the survey will be removed from the sample. 2. Participants who do not correctly complete the manipulation check by stating which city their conversational partner was from will be eliminated from the sample. 3. The free responses at the end of the survey will be read and participants who state that they did not believe that the person they were talking to was really another student will be eliminated. 4. The free responses at the end of the survey will be read and participants who state they did not pay attention during the chat will also be eliminated. 5. Outliers will only be eliminated if there is no variance in the responses (ie, participants simply select the maximum, minimum or default value).

**Missing data**: Missing data will be excluded.

**Assumptions**:

**Scripts**

**Upload an analysis script with clear comments**: [SampleAnalysis.R](https://osf.io/project/ye3wt/files/osfstorage/56afd83f594d90017ec1e046)

**Other**

**Other**:
